# Supplementary material for: The structural basis of blebbistatin inhibition and specificity for myosin II
Source: Springer Nature journal article supplement (doi:10.1038/nsmb908), 2005-03-06
Supplement: 41594_2005_BFnsmb908_MOESM1_ESM.pdf [file 41594_2005_BFnsmb908_MOESM1_ESM.pdf]

### Supplementary Figure 1. (Rayment)

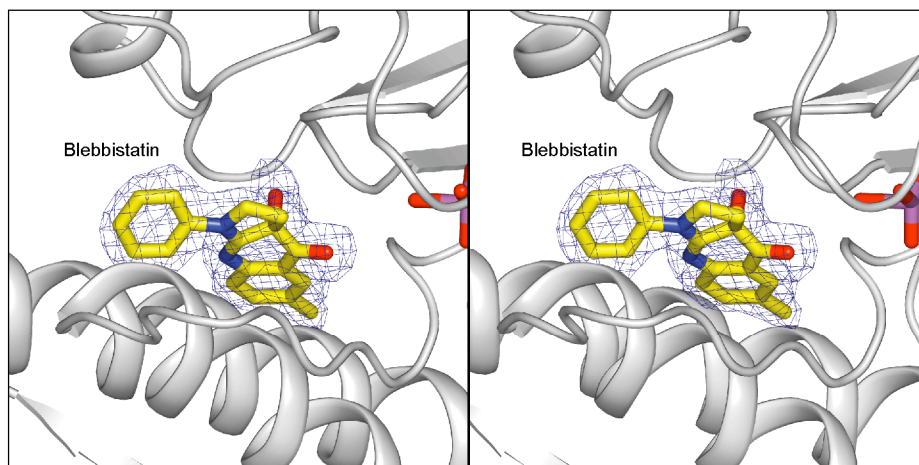

**Supplementary Figure 1.** Stereo view of the electron density for blebbistatin. The map was calculated with coefficients of the form  $F_o - F_c$  where the inhibitor was omitted from the refinement and phase calculation. Electron density was contoured at  $3 \sigma$ .
