# Supplementary material for: The structural basis of blebbistatin inhibition and specificity for myosin II
Source: Springer Nature journal article supplement (doi:10.1038/nsmb908), 2005-03-06
Supplement: 41594_2005_BFnsmb908_MOESM2_ESM.pdf [file 41594_2005_BFnsmb908_MOESM2_ESM.pdf]

## Supplementary Figure 2. (Rayment)

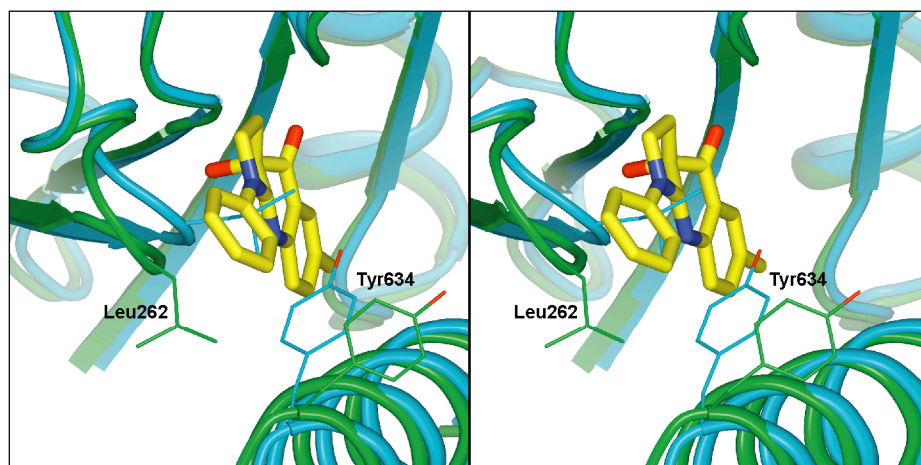

**Supplementary Figure 2.** Stereo view of the apo and blebbistatin-bound forms of MgADP.Vi-S1dC myosin. Apo MgADP.Vi-S1dC myosin (accession number 1VOM) is shown in blue while the blebbistatin-bound form is in green. Leucine 262 and Tyrosine 634 are shown as stick representations for both structures. Blebbistatin is shown as the yellow stick representation.
