# Supplementary material for: The structural basis of blebbistatin inhibition and specificity for myosin II
Source: Springer Nature journal article supplement (doi:10.1038/nsmb908), 2005-03-06
Supplement: 41594_2005_BFnsmb908_MOESM3_ESM.pdf [file 41594_2005_BFnsmb908_MOESM3_ESM.pdf]

**Supplementary Figure 3. (Rayment)**

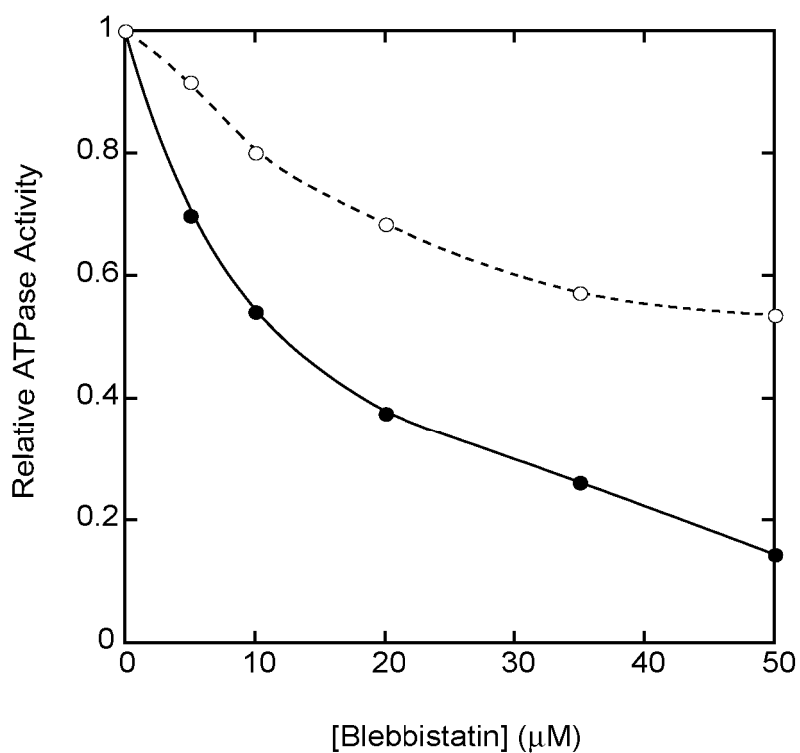

**Supplementary Figure 3.** Blebbistatin inhibits basal and actin-activated ATPase activity of *Dictyostelium* S1dC myosin II. Relative basal (open circles) and actin-activated (solid circles) steady-state ATPase activities of *Dictyostelium* S1dC myosin II at different blebbistatin concentrations. The concentrations of S1dC and actin were 50 nM and 20 μM, respectively.
