# Supplementary material for: The structural basis of blebbistatin inhibition and specificity for myosin II
Source: Springer Nature journal article supplement (doi:10.1038/nsmb908), 2005-03-06
Supplement: 41594_2005_BFnsmb908_MOESM4_ESM.pdf [file 41594_2005_BFnsmb908_MOESM4_ESM.pdf]

**Supplementary Table 1. Data collection and refinement statistics.**

|                                                     | S1dC-Blebbistatin              |
|-----------------------------------------------------|--------------------------------|
| <b>Data collection</b>                              |                                |
| Space group                                         | C222 <sub>1</sub>              |
| Cell dimensions                                     |                                |
| <i>a</i> , <i>b</i> , <i>c</i> (Å)                  | 88.1, 145.8, 152.9             |
| $\alpha$ , $\beta$ , $\gamma$ (°)                   | 118.1, 99.7, 95.4              |
| Resolution (Å)                                      | 40-2.0 (2.07-2.0) <sup>a</sup> |
| <i>R</i> <sub>merge</sub>                           | 6.1 (26.9)                     |
| <i>I</i> / $\sigma$ <i>I</i>                        | 24.5 (3.7)                     |
| Completeness (%)                                    | 99.2 (98.2)                    |
| Redundancy                                          | 5.8 (5.1)                      |
| <b>Refinement</b>                                   |                                |
| Resolution (Å)                                      | 40-2.0 (2.07-2.0)              |
| No. reflections                                     | 392988 (63478)                 |
| <i>R</i> <sub>work</sub> / <i>R</i> <sub>free</sub> | 0.173 / 0.217                  |
| No. atoms                                           |                                |
| S1dC                                                | 5483                           |
| Blebbistatin                                        | 22                             |
| MgADP-Vanadate                                      | 33                             |
| Waters                                              | 726                            |
| <i>B</i> -factors                                   |                                |
| S1dC                                                | 23.3                           |
| Blebbistatin                                        | 14.7                           |
| MgADP-Vanadate                                      | 12.4                           |
| Waters                                              | 35.5                           |
| R.m.s deviations                                    |                                |
| Bond lengths (Å)                                    | 0.022                          |
| Bond angles (°)                                     | 1.672                          |

All data was collected from a single S1dC\_Blebbistatin crystal. <sup>a</sup> Highest resolution shell is shown in parenthesis.
